# Supplementary material for: Sonication-induced instant amyloid-like fibril formation and organogelation by a tripeptide
Source: Royal Society of Chemistry journal article supplement (doi:10.1039/c1sm05277b), 2011-01-01
Supplement: c1sm05277b.pdf [file c1sm05277b.pdf]

## Supporting Information

# Sonication-induced instant amyloid-like fibril formation and organogelation by a tripeptide

Sibaprasad Maity, Pankaj Kumar and Debasish Haldar\*

Department of Chemical Sciences, Indian Institute of Science Education and Research –Kolkata,  
Mohanpur, West Bengal- 741252, India.

E-mail: [deba\\_h76@yahoo.com](mailto:deba_h76@yahoo.com) ; [deba\\_h76@iiserkol.ac.in](mailto:deba_h76@iiserkol.ac.in)

### Table of contents

|               |   |            |    |
|---------------|---|------------|----|
| ESI Figure S1 | 2 | Figure S4  | 6  |
| ESI Figure S2 | 3 | Figure S5  | 7  |
| Scheme 1      | 4 | Figure S6  | 8  |
| Figure S1     | 5 | Figure S7  | 8  |
| Figure S2     | 5 | Figure S8  | 9  |
| Figure S3     | 6 | Figure S9  | 9  |
|               |   | Figure S10 | 10 |

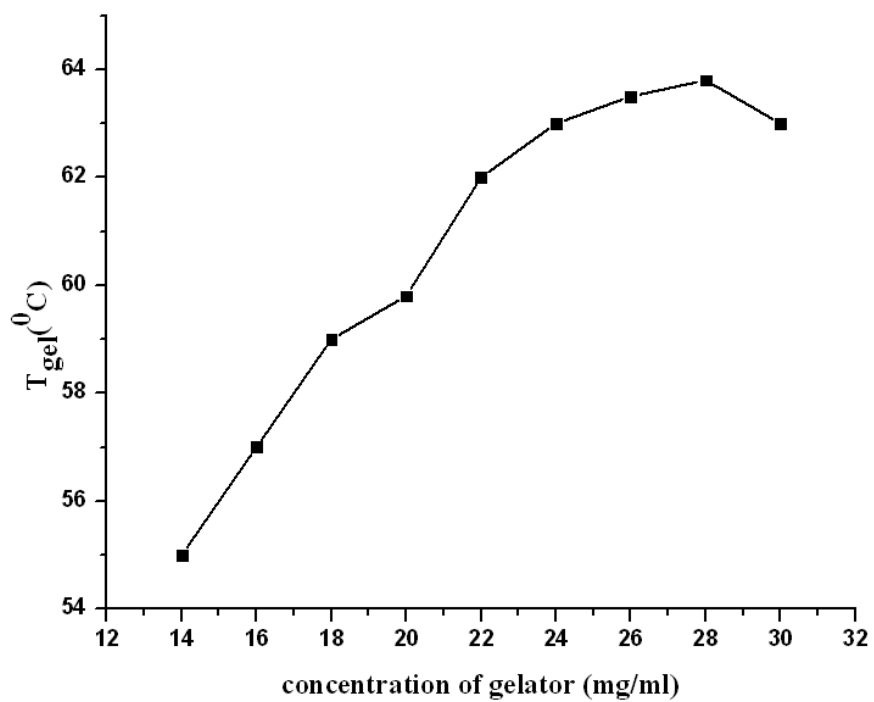

**ESI Figure S1:** The change of  $T_{gel}$  with respect to concentration of sonication induced gel obtained from peptide **1** in *p*-xylene. Sonication time 40 seconds.

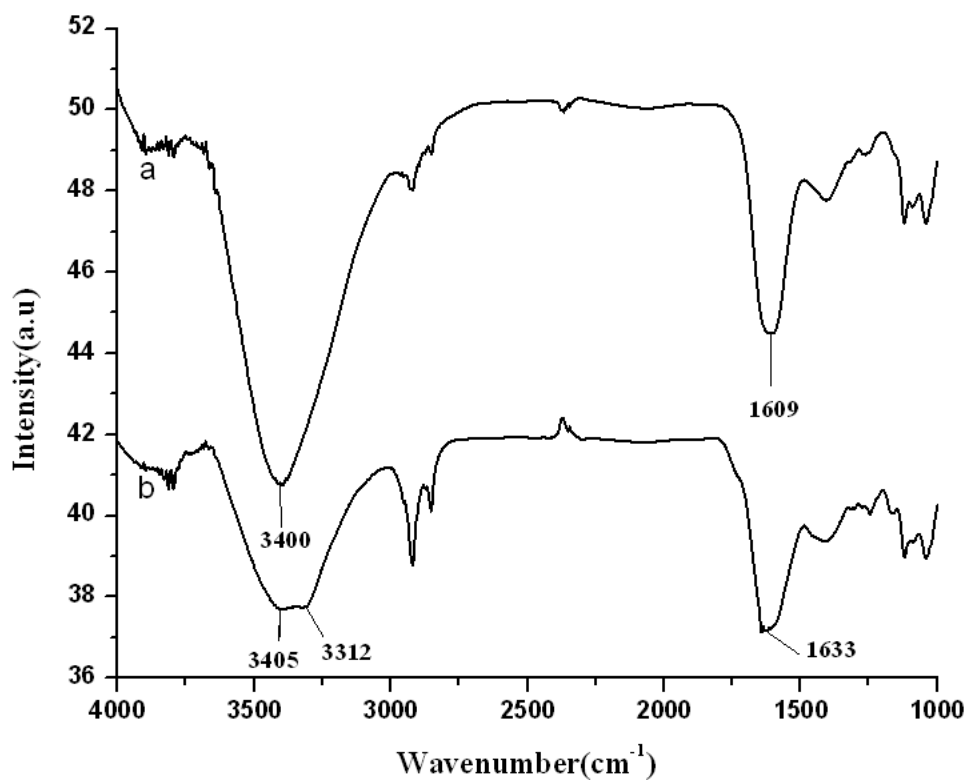

**ESI Figure S2:** The FTIR spectra (solution state) of peptide 1 in *p*-xylene (a) before sonication and (b) after sonication showing structural transition to intermolecular hydrogen bonded conformation.

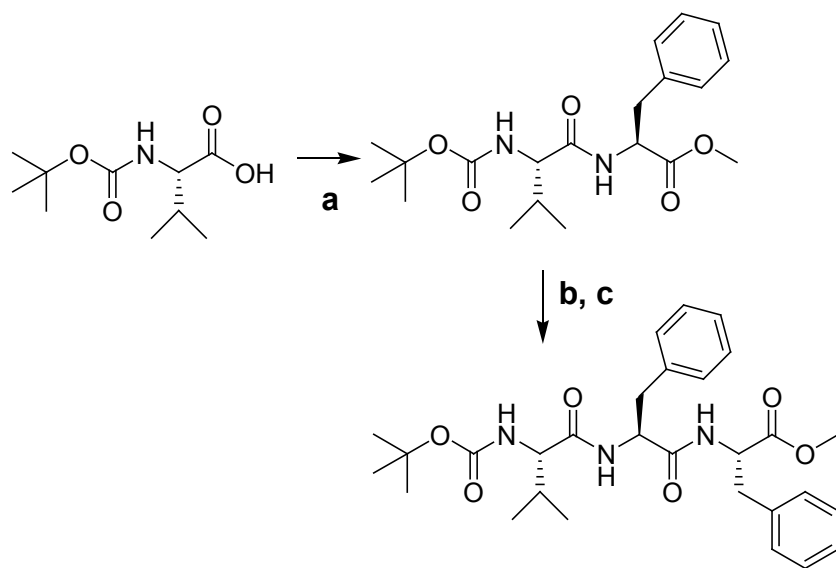

**Scheme 1:** Schematic presentation of synthesis of peptide **1**. Reagents and conditions: a) DCM, H-Phe-OMe, DCC, HOBT, 0°C 74.89%; b) NaOH (2N), MeOH, HCl; c) DCM, H-Phe-OMe, DCC, HOBT, 0°C 75.20% .

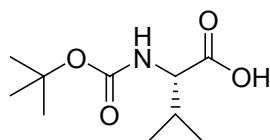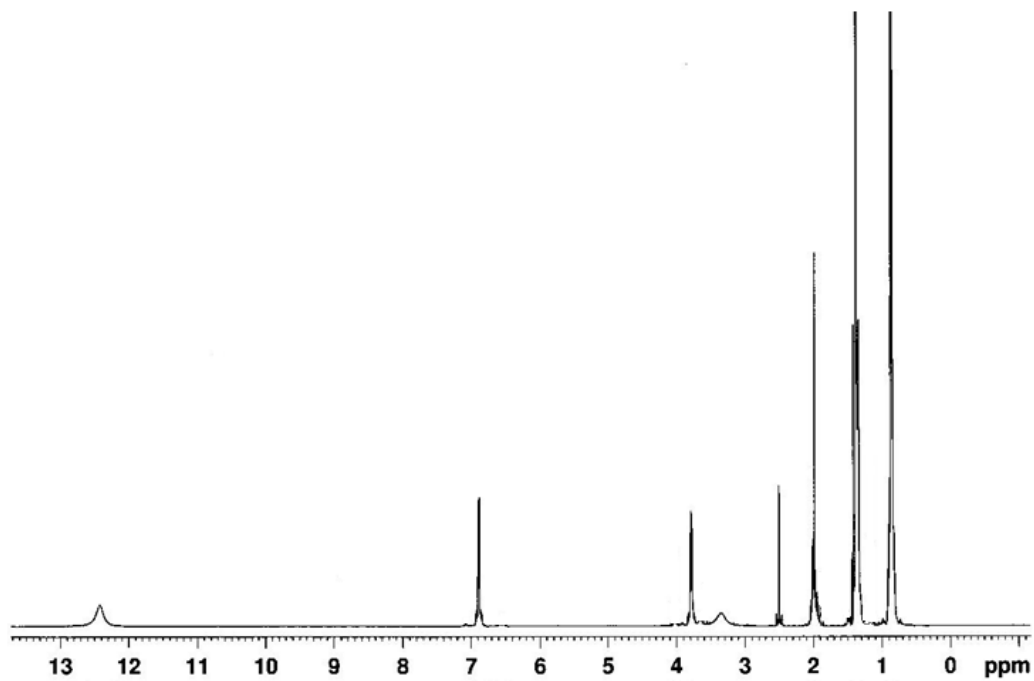

Figure S1:  $^1\text{H}$  NMR (500 MHz,  $\text{DMSO-}d_6$ ) spectra of Boc-Val(1)-OH 2.

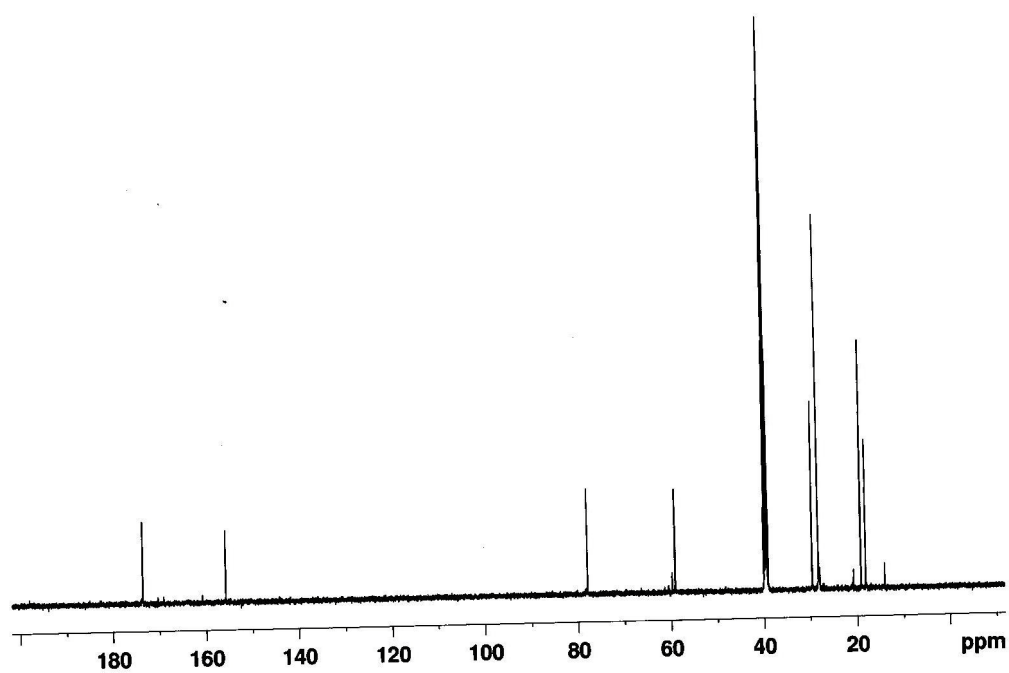

Figure S2:  $^{13}\text{C}$  NMR (125 MHz,  $\text{DMSO-}d_6$ ) spectra of Boc-Val(1)-OH 2.

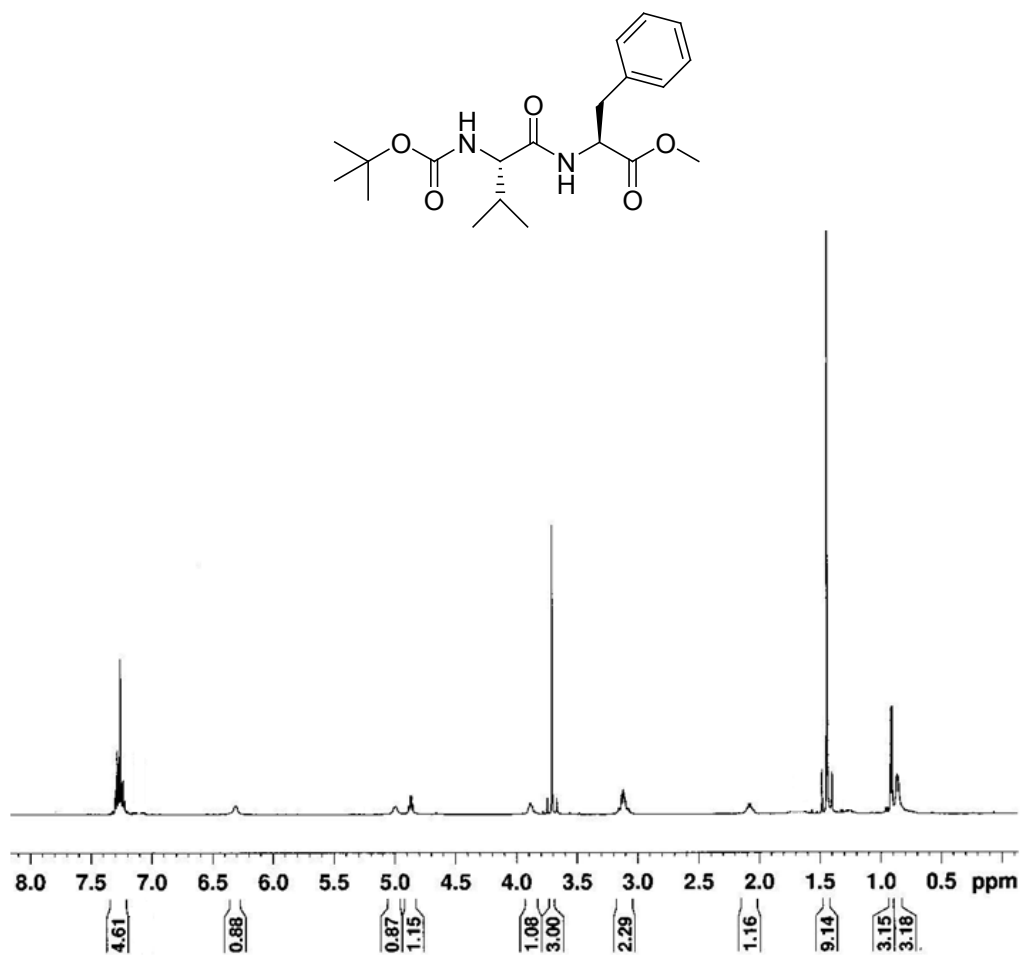

Figure S3: <sup>1</sup>H NMR (500 MHz, CDCl<sub>3</sub>) spectra of Boc-Val(1)-Phe(2)-OMe 3.

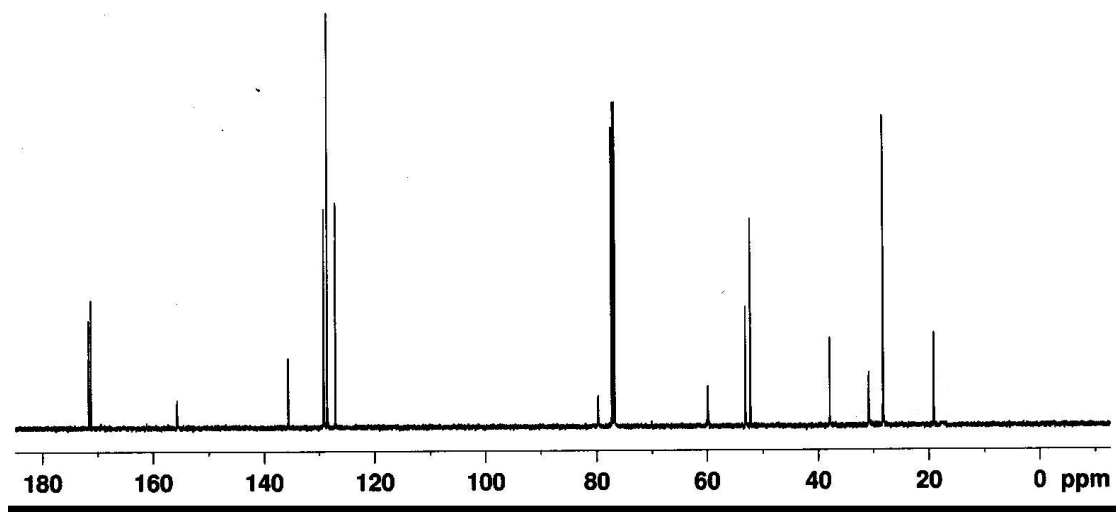

Figure S4: <sup>13</sup>C NMR (125 MHz, CDCl<sub>3</sub>) spectra of Boc-Val(1)-Phe(2)-OMe 3.

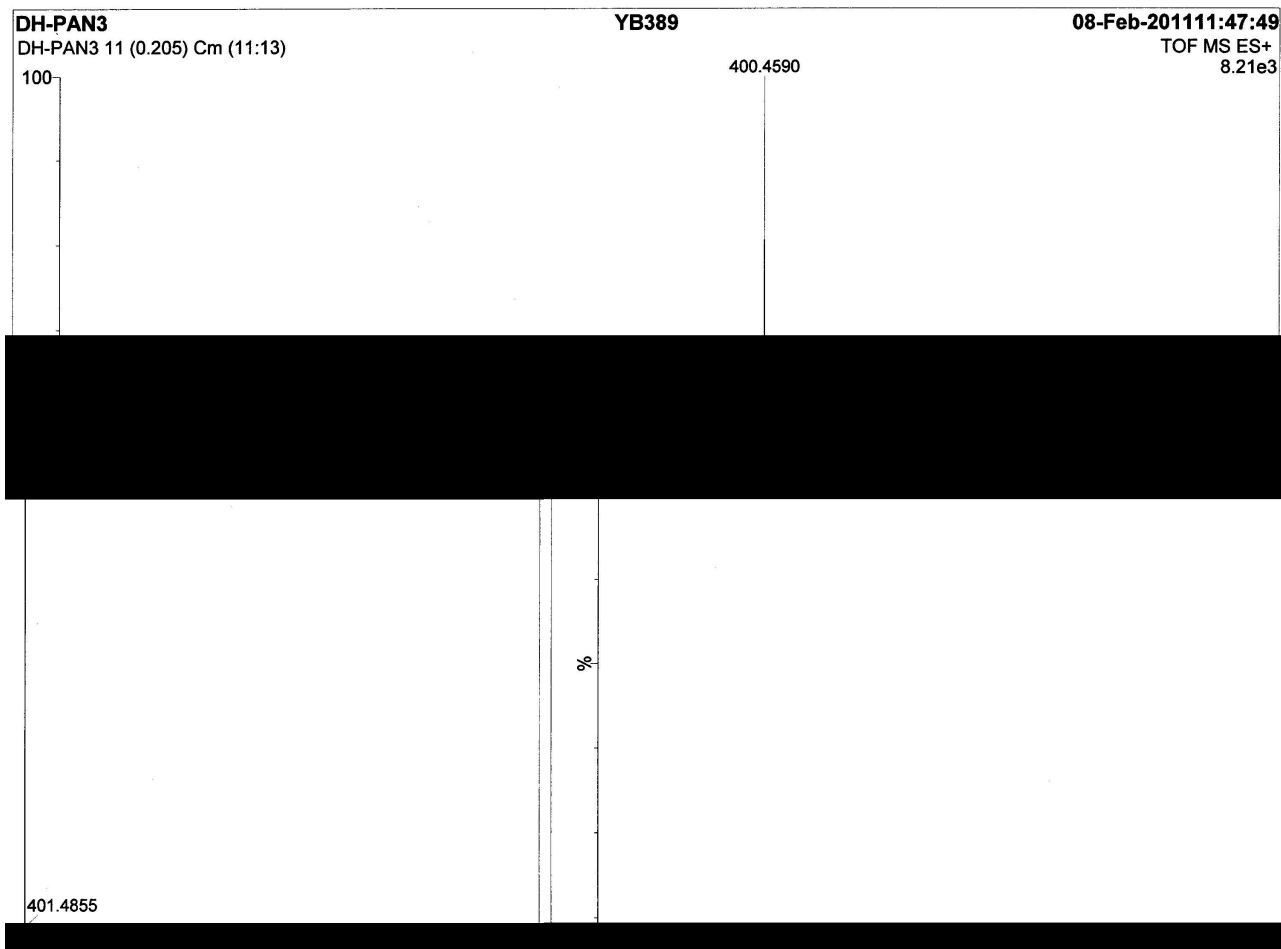

Figure S5: Mass spectra of Boc-Val-Phe-OMe 3.

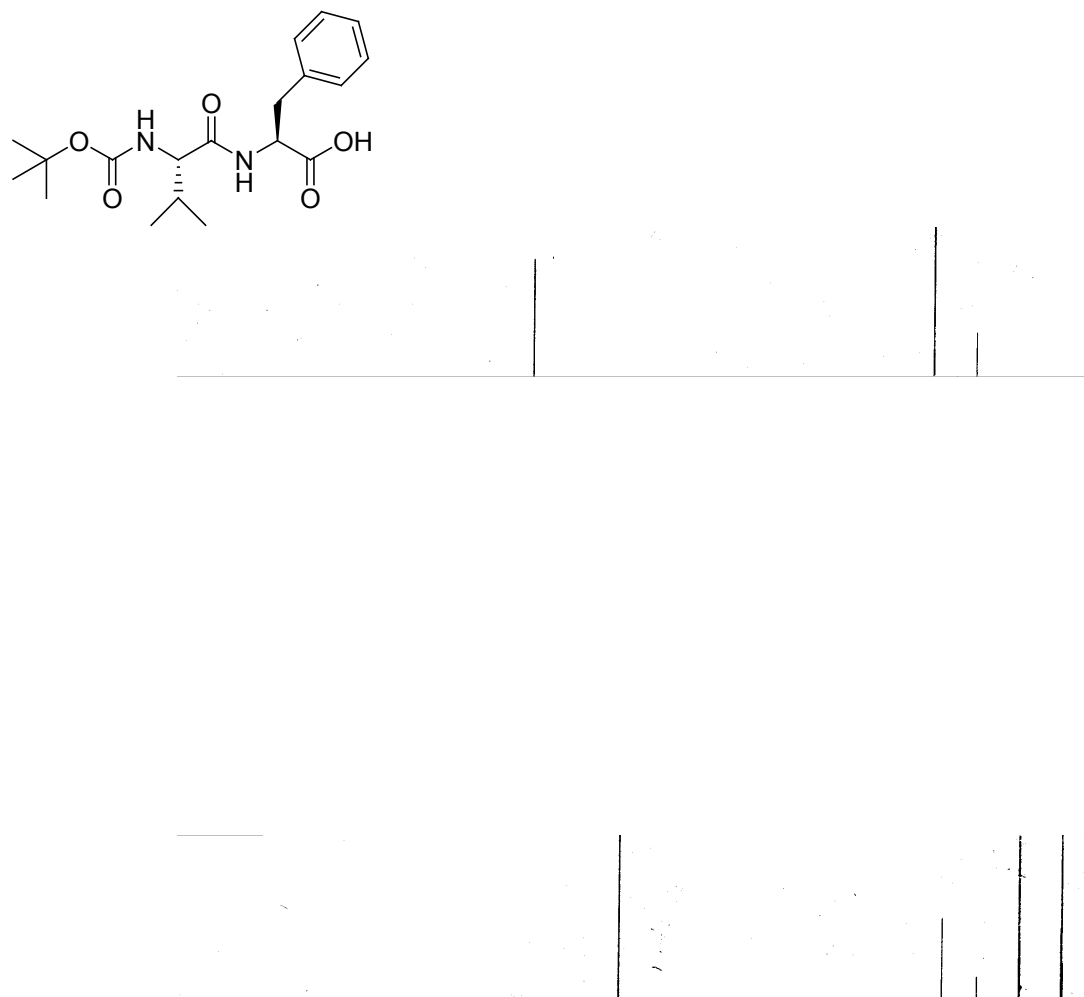

Figure S6: <sup>1</sup>H NMR (400 MHz, DMSO-*d*<sub>6</sub>) spectra of Boc-Val(1)-Phe- OH 4.

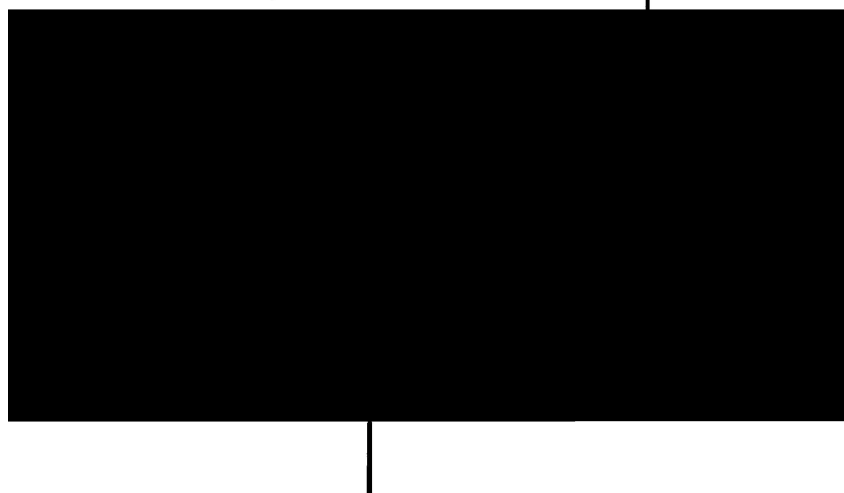

Figure S7: <sup>13</sup>C NMR (125 MHz, DMSO-*d*<sub>6</sub>) spectra of Boc-Val(1)-Phe(2)-OH 4.



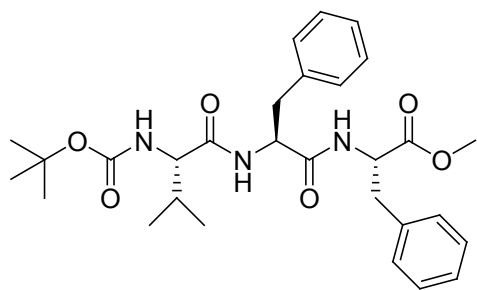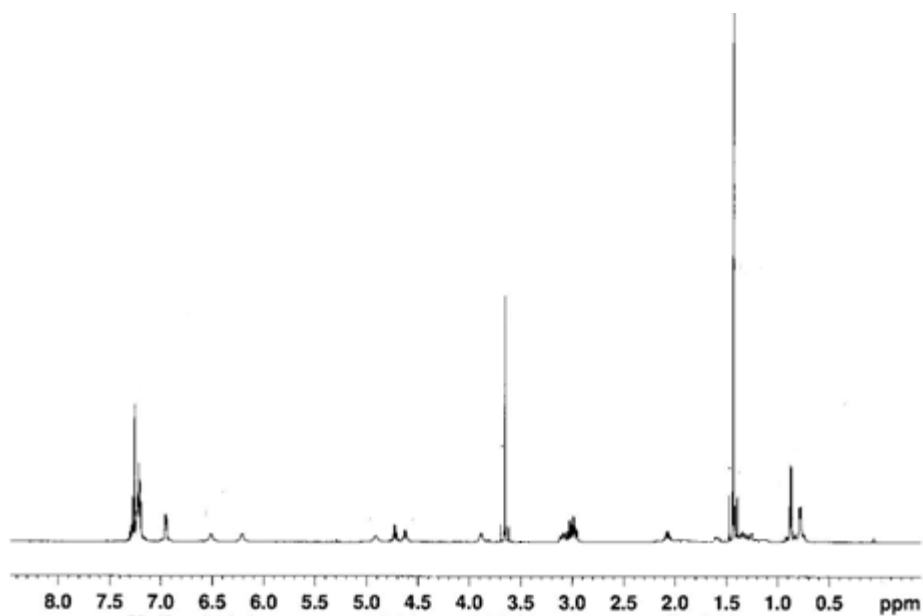

Figure S8: <sup>1</sup>H NMR (500 MHz, CDCl<sub>3</sub>) spectra of Boc-Val(1)-Phe(2)-Phe(3)-OMe **1**.

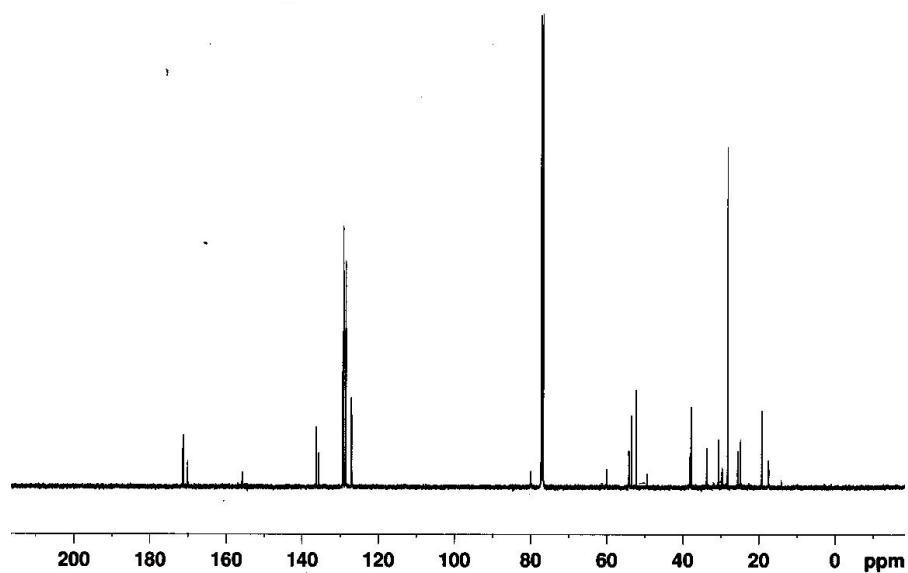

Figure S9: <sup>13</sup>C NMR (125 MHz, CDCl<sub>3</sub>) spectra of Boc-Val(1)-Phe(2)-Phe(3)-OMe **1**.

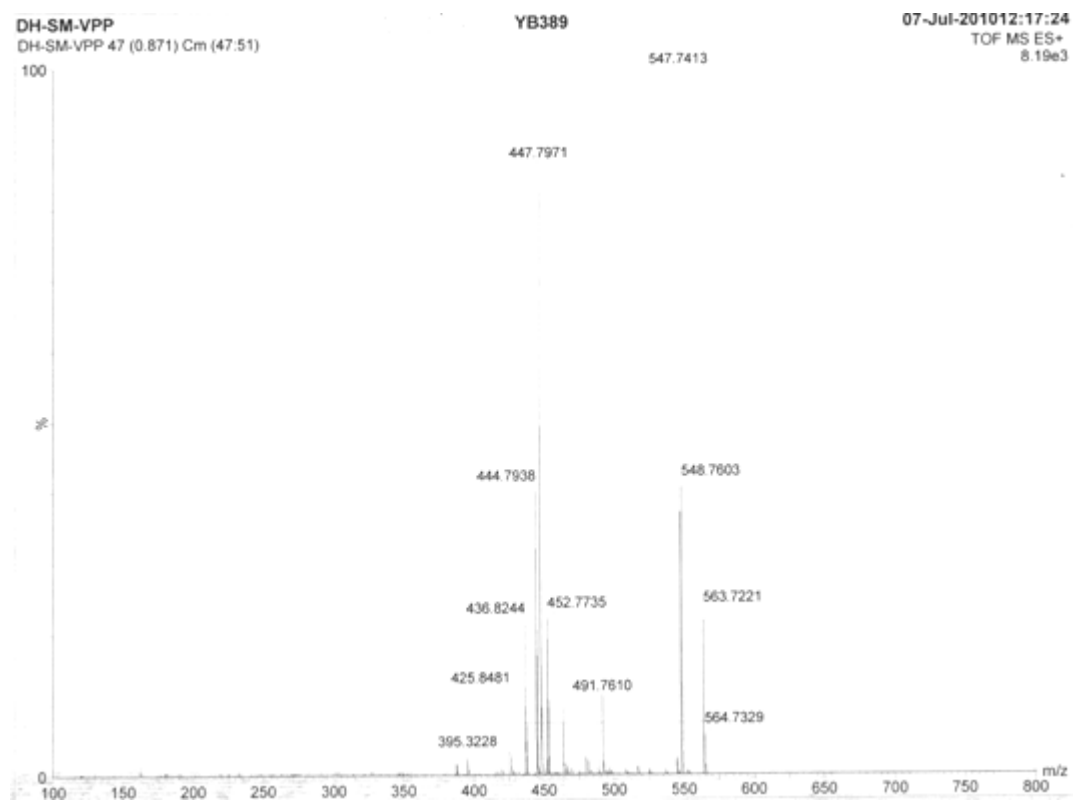

**Figure S10:** Mass spectra of Boc-Val(1)-Phe(2)-Phe(3)-OMe 1.
